# Supplementary material for: Mn12 single-molecule magnet aggregates as magnetic resonance imaging contrast agents
Source: Royal Society of Chemistry journal article supplement (doi:10.1039/c0cc03758c), 2011-01-01
Supplement: c0cc03758c.pdf [file c0cc03758c.pdf]

## Electronic Supplementary Information

# Mn<sub>12</sub> Single-Molecule Magnet Aggregates as Magnetic Resonance Imaging Contrast Agents

*Yinglin Wang,<sup>a</sup> Wen Li,<sup>a</sup> Shengyan Zhou,<sup>b</sup> Daliang Kong,<sup>b</sup> Haishan Yang,<sup>b</sup>*

*and Lixin Wu<sup>\*a</sup>*

<sup>a</sup> State Key Laboratory of Supramolecular Structure and Materials, Jilin University,  
Changchun 130012, P. R. China.

<sup>b</sup> Radiology Department, China-Japan Union Hospital of Jilin University, Changchun,  
Jilin, P. R. China

\* To whom correspondence should be addressed. E-mail: [wulx@jlu.edu.cn](mailto:wulx@jlu.edu.cn)

**Materials:** CH<sub>3</sub>(CH<sub>2</sub>)<sub>17</sub>(OCH<sub>2</sub>CH<sub>2</sub>)<sub>n</sub>OH (average  $M_n = 711$ ) was a product from Aldrich. Bovine serum Albumin (BSA) was obtained from Dingguo Biotechnology (Beijing, China).

**Instrument:** The mass spectrum (MS) was recorded using an autoflex TOF/TOF (Bruker, Germany) mass spectrometer, equipped with a nitrogen laser (337 nm, 3 ns pulse). The mass spectrometer was operated in the negative ion reflector mode. Elemental analysis was performed on the Flash EA1112 from ThermoQuest Italia S.P.A. Thermogravimetric analysis (TGA) was performed on Perkin-Elmer7 series thermal analysis system in a N<sub>2</sub> flow with a heating rate of 10 °C min<sup>-1</sup>. The inductive couple plasma-optical emission spectrometer (ICP-OES) was performed on Thermo

Scientific iCAP ICP-OES 6000 Series. FT-IR spectra were recorded on a Bruker Vertex 80v FT-IR spectrometer equipped with a DTGS detector (32 scans) with a resolution of  $4\text{ cm}^{-1}$  on a KBr pellet. Hydrodynamic diameters were determined on Nano-ZS instrument (Malvern Instruments). TEM images were carried out on Hitachi H8100 electron microscope. Magnetization hysteresis data were collected at 2 K, between +5 T and -5 T, cooling the samples at zero field with a magnetometer (Quantum Design MPMSXL-5) equipped with a SQUID sensor.  $^1\text{H}$  NMR spectra were recorded on a Bruker Ultrashield 500 MHz spectrometer, and all the relaxation times were recorded on the same instrument, at 25 °C with a least square fitting to 16 data points.  $r_1$  and  $r_2$  are defined as the changes in  $1/T_1$  and  $1/T_2$  normalized to the concentration of metal ion, with unit of  $\text{mM}^{-1}\text{ s}^{-1}$ . The  $r_1$  and  $r_2$  values can be calculated as the slopes of the lines  $1/T_1$  and  $1/T_2$  versus the CA concentration. All the MRI experiments were performed in a clinical 1.5 T MRI instrument (Signa HDx 1.5 T Series) at room temperature: 32 echoes; repetition time (TR): 1000 ms; echo times (TE): 6–67 ms.

**Preparation of stearic acid modified  $\text{Mn}_{12}$  ( $\text{Mn}_{12}\text{-C}_{18}$ ):** A mixture of  $\text{Mn}_{12}\text{-Ac}$  (0.1 mmol) and stearic acid (3 mmol) was dissolved in 50 ml of 1:1 (v:v) solution of toluene and dichloromethane. The mixture was stirred for 24 h at 50 °C, which was then filtrated and concentrated. Toluene was added and then evaporated to remove free  $\text{CH}_3\text{CO}_2\text{H}$ . To make the acetic acid ligands completely substituted, this procedure was repeated four times. The results brown solid was dissolved in hot methanol (65 °C), filtered and washed with hot methanol five times to remove the superfluous stearic acid. The obtained brown product was dried under vacuum.

**The characterization of  $\text{Mn}_{12}\text{-C}_{18}$ :** IR (KBr,  $\text{cm}^{-1}$ )  $\nu = 2920, 2850, 1583, 1569, 1531, 1468, 1455, 1443, 1429, 1380, 1317, 1261, 1098, 1025, 868, 804, 721, 705, 673, 641, 610, 585$ . LDI-TOF mass spectra of  $\text{Mn}_{12}\text{-C}_{18}$  show the presence of  $[\text{Mn}_{12}\text{O}_{12}(\text{OOCCH}_3)_4(\text{OCC}_{17}\text{H}_{35})_{11}]^-$  ion at  $m/z = 4206.4$ , and fragments resulting from the stepwise loss of several  $\text{C}_{17}\text{H}_{35}\text{CO}_2$  units ( $\Delta m/z = 283$ ) and  $\text{CH}_3\text{CO}_2$  units ( $\Delta$

$m/z = 59$ ). Anal. Calcd for  $\text{Mn}_{12}\text{-C}_{18}$  ( $\text{C}_{208}\text{H}_{402}\text{O}_{45}\text{Mn}_{12}$ , 4282.65): C, 58.33; H, 9.45. Found: C, 57.99; H, 8.99. The TGA at range of 30–150 °C corresponds to the loss of crystallized water (0.52 %), and the calculated number of crystallized water is ca. 1. Combining the MS, TGA and elemental analysis,  $\text{Mn}_{12}\text{-C}_{18}$  should correspond to the formula of  $\text{Mn}_{12}\text{O}_{12}(\text{OOCCH}_3)_5(\text{OCC}_{17}\text{H}_{35})_{11}\text{H}_2\text{O}$ .

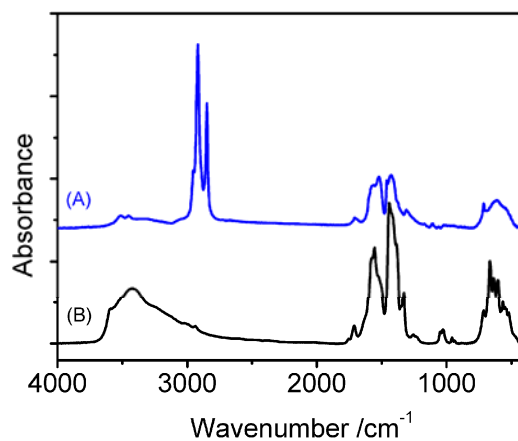

**Fig. S1** IR spectra of (A)  $\text{Mn}_{12}\text{-C}_{18}$  and (B)  $\text{Mn}_{12}\text{-Ac}$  in solid state.

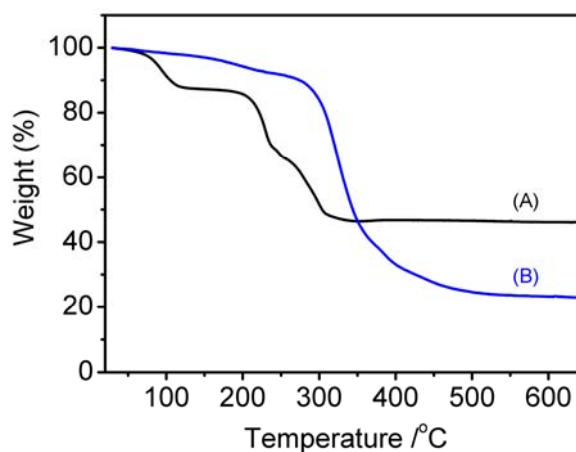

**Fig. S2** TGA graphs of (A)  $\text{Mn}_{12}\text{-Ac}$  and (B)  $\text{Mn}_{12}\text{-C}_{18}$ .

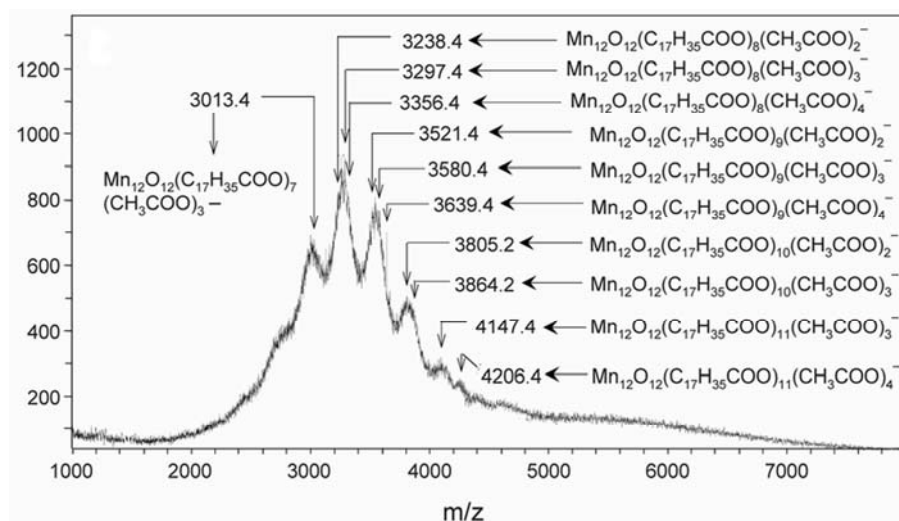

**Fig. S3** High mass region of the negative mode LDI-TOF mass spectrum of  $\text{Mn}_{12}\text{-C}_{18}$ .

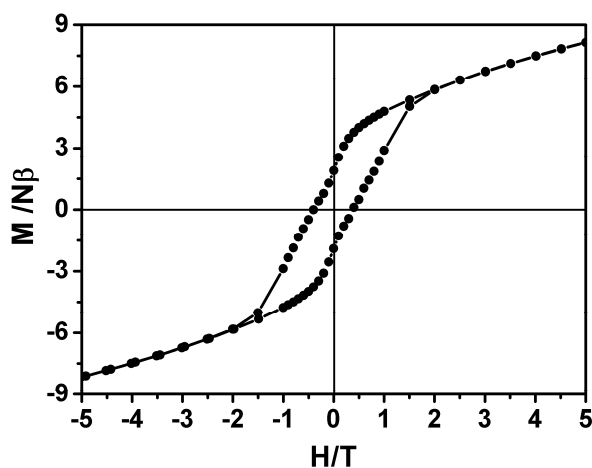

**Fig. S4** The magnetization hysteresis loop measured at 2 K for  $\text{Mn}_{12}\text{-C}_{18}$ .

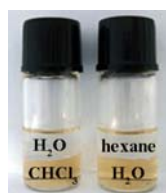

**Fig. S5** Photograph of  $\text{Mn}_{12}\text{-C}_{18}/\text{C}_{18}\text{EO}_{10}$  aqueous solution extracted by chloroform and *n*-hexane.

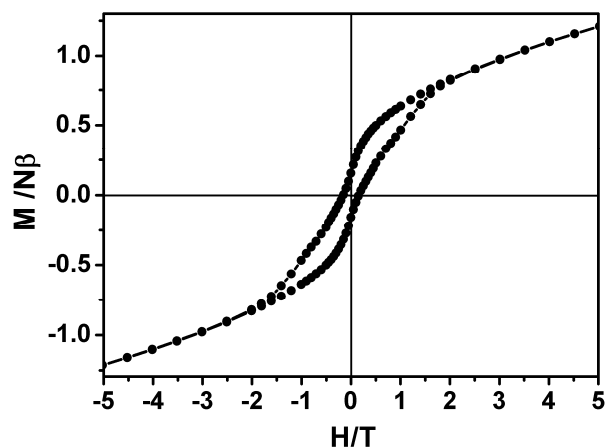

**Fig. S6** Magnetization hysteresis loop at 2 K for  $\text{Mn}_{12}\text{-C}_{18}/\text{C}_{18}\text{EO}_{10}$  complexes.

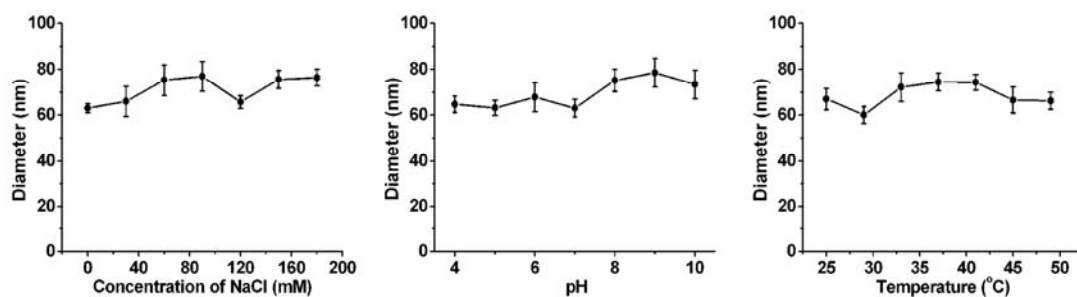

**Fig. S7** Plots of hydrodynamic diameter of  $\text{Mn}_{12}\text{-C}_{18}/\text{C}_{18}\text{EO}_{10}$  aggregates versus different (a) NaCl concentration, (b) pH conditions, and (c) temperature.

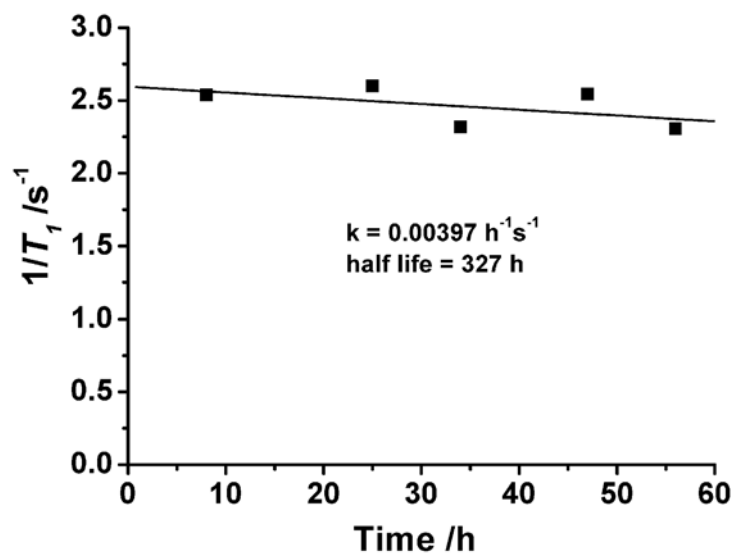

**Fig. S8** The longitudinal relaxation rate  $1/T_1$  changes against time.
